# Supplementary material for: A survey of how biology researchers assess credibility when serving on grant and hiring committees
Source: PeerJ. 2026 Jan 15;14:e20502. doi: 10.7717/peerj.20502 (PMC12812271; doi:10.7717/peerj.20502)
Supplement: Supplemental Information 1 — Supplementary Table 1-Organizations List of organizations contacted to request distribution of the survey. Supplementary Table 2-PCA Table Loadings. Principal Components Analysis showing the summary importance of each aspect of credibility assessment to the principal components as well as the table loadings. PCA was based on a correlation matrix. Supplementary Figure 1-PCA Analysis PCA Analysis showing the contribution of each aspect of credibility assessment to the first and second principal components. Colour indicates the level of contribution. Supplementary Table 3 -Ratings Importance and satisfaction ratings for participant s’ ability to assess aspects of assessment; different types of research outputs; and to achieve assessment-related goals. 95% confidence intervals are included in square brackets. Supplementary Table 4 -Importance by Segment Segmentation of importance ratings in Supplementary Table 3-Ratings by type of committee; discipline; country; career stage. Statistically significant (p < 0.05) differences between segments are indicated. Supplementary Table 5 -Satisfaction by Segment Segmentation of satisfaction ratings in Supplementary Table 3-Ratings by type of committee; discipline; country; career stage. Statistically significant (p < 0.05) differences between segments are indicated. Supplementary Table 6 -Methods Frequency of use of different methods for assessing the 7 different aspects of assessment, including a summary table to quantity use of “extrinsic proxies” (author or lab reputation, journal reputation, journal impact factor). 95% confidence intervals are included in square brackets. Supplementary Table 7 -Methods by Segment Segmentation of use of different methods in Supplementary Table 6-Methods by type of committee; discipline; country; career stage. Statistically significant (p < 0.05) differences between segments are indicated. [file peerj-14-20502-s001.xlsx]

## Sheet: Table 1-Organizations
Organization Contacted	Website
ACRL Scholarly Communication Discussion List	https://www.ala.org/acrl/
ALLEA	https://allea.org/
American Institute of Biological Sciences (AIBS)	https://www.aibs.org/
American Society for Biochemistry and Molecular Biology (ASBMB)	https://www.asbmb.org/ https://www.asbmb.org
American Society for Microbiology	https://asm.org
American Society for Virology (ASV)	https://asv.org/
American Society of Human Genetics	https://www.ashg.org
American Society of Plant Biologists	https://aspb.org
ANECA - Agencia Nacional de Evaluación de la Calidad y Acreditación, ANECA	http://www.aneca.es/eng/ANECA
ASAPBio	https://asapbio.org/
ASCB American Society for Cell Biology	https://www.ascb.org/
Association for Women in Science	https://www.awis.org https://www.awis.org/about-awis/staff/
Association of German Science Organisations	www.hrk.de
British Ecological Society	https://www.britishecologicalsociety.org
British Society for Cell Biology	https://bscb.org/ https://bscb.org/staff-members/
Center for Open Science (Dave Mellor)	https://www.cos.io/
Chan Zuckerberg Initiative	https://chanzuckerberg.com/
CODATA International listserv	https://codata.org/
DORA	https://sfdora.org/
eLife	https://elifesciences.org/
EMBO	https://www.embo.org/
EURODOC	http://www.eurodoc.net/eurodoc
European Research Council	https://erc.europa.eu/
European Society for Evolutionary Biology	https://eseb.org/
European University Alliance	https://eua.eu/
Federation of American Societies for Experimental Biology (FASEB)	https://www.faseb.org/ https://www.faseb.org/about
Federation of European Societies of Plant Biology	https://fespb.org/
Global Young Academy	https://globalyoungacademy.net/team/
GRN	https://reproducibilitynetwork.de/
HHMI	https://www.hhmi.org/
HRA	https://www.healthra.org/
Interacademy Partnership	https://www.interacademies.org/
International Society for Microbial Ecology	https://www.isme-microbes.org
Jisc Research Data Management listserv	https://www.jisc.ac.uk/guides/rdm-toolkit
LERU	https://www.leru.org/about-leru
LIB-license (librarian listserv)
National Science Foundation (Office of International Science and Engineering)	https://nsf.gov/dir/index.jsp?org=OISE
Open Research Funders Group and HELIOSopen.org
RORI	https://researchonresearch.org/
Royal Society of Biology	https://www.rsb.org.uk/ https://www.rsb.org.uk/about-us/our-team
Science Europe	https://www.scienceeurope.org/about-us/
Sloan Foundation	https://sloan.org/
Society for Experimental Biology	https://www.sebiology.org
Society for General Microbiology	https://microbiologysociety.org
Society for the Study of Evolution	http://www.evolutionsociety.org
The Society for Systematic Biologists	https://www.systbio.org/
The Society of Integrative & Comparative Biology	https://sicb.org/
UK Reproducibility Network	https://www.ukrn.org/
UKRN list for open research and responsible research assessment	https://www.jiscmail.ac.uk
Wellcome Trust	https://wellcome.org/

## Sheet: Table 2-PCA Table Loadings
Figure 1 - Principal Components Analysis showing the summary importance of each aspect of credibility assessment to the principal components as well as the table loadings. PCA was based on a correlation matrix.
	PC1	PC2	PC3	PC4	PC5	PC6	PC7
Standard deviation	1.79503	0.985623	0.910008	0.766634	0.74476	0.672959	0.618898
Proportion of Variance	0.4603	0.13878	0.1183	0.08396	0.07924	0.0647	0.05472
Cumulative Proportion	0.4603	0.59908	0.71739	0.80135	0.88058	0.94528	1
Table Loadings	PC1	PC2	PC3	PC4	PC5	PC6	PC7
Evaluate if research is credible	0.401937	-0.0383618	0.503955	-0.147573	0.472094	0.155462	0.560523
Evaluate if research is trustworthy or reliable	0.440961	-0.0763046	0.319473	-0.258151	0.116326	0.0372431	-0.784925
Evaluate if research was well designed	0.414937	-0.13628	0.141775	0.6095	-0.17798	-0.619435	0.0478352
Evaluate if research outputs are transparent and shared openly	0.345735	0.0677675	-0.700472	-0.282138	0.432126	-0.34208	0.0431432
Evaluate if research was conducted ethically	0.404773	-0.157726	-0.09074	-0.45982	-0.724014	0.0601643	0.252582
Evaluate if research is fully reported	0.412315	0.0341763	-0.335689	0.49888	-0.00945716	0.682242	-0.0414232
Evaluate if research is impactful	0.135829	0.971337	0.110838	-0.0131288	-0.144569	-0.0682109	0.00664956

## Sheet: Figure 1-PCA Analysis
Figure 1 - Principal Components Analysis showing the contribution of each aspect of credibility assessment to the first and second principal components. Colour indicates the level of contribution. Only the first two components are shown given they explain 60% of the variance in the data. PCA was based on a correlation matrix.

## Sheet: Table 3-Ratings
General (When serving on a committee, how important is it to you to…?) (When using the resources currently available to you, how satisfied are you with your ability to…?)	Importance (% Very or Extremely Important)	Satisfaction (% Very or Extremely Satisfied)
Assess a candidate's research outputs	82% [79%, 86%]	56% [51%, 60%]
Needs (When assessing a candidate's research outputs, how important is it to you that you are able to...?) (When assessing a candidate's research outputs, how satisfied are you with your ability to...?)	Importance (% Very or Extremely Important) [95% CI]	Satisfaction (% Very or Extremely Satisfied) [95% CI]
Aspects of Assessment
Evaluate if research is credible	90% [87%, 92%]	38% [33%, 42%]
Evaluate if research is trustworthy or reliable	91% [88%, 94%]	32% [28%, 36%]
Evaluate if research was well designed	82% [79%, 86%]	49% [44%, 54%]
Evaluate if research outputs are transparent and shared openly	59% [54%, 63%]	39% [35%, 44%]
Evaluate if research was conducted ethically	73% [68%, 76%]	31% [27%, 36%]
Evaluate if research is fully reported	65% [60%, 69%]	32% [27%, 36%]
Evaluate if research is impactful	54% [49%, 58%]	45% [41%, 50%]
Types of Outputs
Evaluate if peer-reviewed publications are credible	81% [77%, 84%]	46% [41%, 50%]
Evaluate if preprints are credible	40% [35%, 44%]	24% [20%, 28%]
Evaluate if shared code is credible	41% [36%, 45%]	19% [15%, 23%]
Evaluate if shared lab protocols are credible	51% [47%, 56%]	25% [21%, 29%]
Evaluate if shared datasets are credible	56% [52%, 61%]	23% [19%, 27%]
Assessment Goals
Evaluate if methods are sound	79% [75%, 83%]	41% [36%, 45%]
Evaluate if research is transparently reported	65% [60%, 69%]	30% [26%, 34%]
Evaluate if conclusions are well supported	86% [82%, 89%]	55% [50%, 59%]
Evaluate if there are signs of fabrication, falsification, or plagiarism	84% [80%, 87%]	20% [16%, 24%]
Evaluate if statistical analyses are valid	69% [65%, 73%]	31% [27%, 36%]
Evaluate if research outputs advance the field	62% [57%, 66%]	45% [40%, 49%]
Evaluate if research outputs have societal impact	19% [16%, 23%]	28% [24%, 32%]

## Sheet: Table 4-Importance by Segment
When assessing a candidate's research outputs, how important is it to you that you are able to...?
		Segment_Committee		Segment_Discipline			Segment_Country			Segment_Career_Stage
		Grant Only	Hiring and Promotion Only	Cell Biology	Other Lab Biology	All Other Biology	US	UK or EU	Other Country	0-15 Years	16 or More Years
		A*	B	C	D	E	F	G	H	I	J
	#Total	110	89	50	396	35	182	207	96	109	373
Overall
When serving on a committee, how important is it to you to assess a candidate's research outputs?**	% 4-5	0.75	69%	88%	81%	89%	83%	81%	84%	73%	85% I
Aspects of Assessment
Evaluate if research is credible	% 4-5	88%	81%	88%	89%	97%	93%	87%	89%	83%	92% I
Evaluate if research is trustworthy or reliable	% 4-5	89%	84%	88%	91%	97%	91%	91%	92%	88%	92%
Evaluate if research was well designed	% 4-5	83%	76%	80%	83%	86%	82%	84%	80%	83%	82%
Evaluate if research outputs are transparent and shared openly	% 4-5	62%	51%	68%	58%	51%	58%	58%	60%	61%	58%
Evaluate if research was conducted ethically	% 4-5	79% B	64%	82%	71%	80%	76%	68%	76%	79%	71%
Evaluate if research is fully reported	% 4-5	73% B	55%	76%	63%	71%	65%	66%	61%	59%	66%
Evaluate if research is impactful	% 4-5	60% B	46%	74% D	50%	66%	65% G	43%	0.56	52%	54%
Types of Outputs
Evaluate if peer-reviewed publications are credible	% 4-5	80%	73%	80%	81%	83%	82%	78%	86%	75%	83%
Evaluate if preprints are credible	% 4-5	47%	42%	54%	38%	37%	41%	38%	41%	43%	39%
Evaluate if shared code is credible	% 4-5	47%	35%	50%	41%	26%	42%	40%	42%	42%	40%
Evaluate if shared lab protocols are credible	% 4-5	57%	53%	58%	0.52	34%	49%	54%	51%	60% J	49%
Evaluate if shared datasets are credible	% 4-5	65%	61%	66%	57%	46%	58%	56%	55%	61%	55%
Assessment Goals
Evaluate if methods are sound	% 4-5	81%	73%	80%	80%	83%	82%	78%	77%	80%	79%
Evaluate if research is transparently reported	% 4-5	70%	64%	70%	64%	71%	59%	68%	69%	72%	62%
Evaluate if conclusions are well supported	% 4-5	91% B	73%	86%	86%	86%	89%	85%	83%	83%	87%
Evaluate if there are signs of fabrication, falsification, or plagiarism	% 4-5	89%	83%	88%	84%	86%	85%	83%	85%	85%	84%
Evaluate if statistical analyses are valid	% 4-5	75%	63%	68%	68%	80%	69%	67%	74%	74%	67%
Evaluate if research outputs advance the field	% 4-5	65% B	46%	72%	60%	66%	0.67	57%	61%	59%	62%
Evaluate if research outputs have societal impact	% 4-5	22%	19%	24%	19%	20%	23% G	13%	26% G	22%	18%
*Columns tested for significantly different percentage responses (letters shown in Row 4): A/B, C/D/E, F/G/H, I/J
Percentages within Segment groups were compared using a z-test with a significance level set at p< 0.05. All statistical analysis was conducted in R using the expss package.
A letter in any cell indicates that the percentage response of the segment in the cell is significantly higher than the segment represented by the letter (see row 4)
**Full question for this item differs: "When serving on a committee, how important is it to you to assess a candidate's research outputs?"

## Sheet: Table 5-Satisfaction by Segment
When using the resources currently available to you, how satisfied are you with your ability to...?
		Segment_Committee		Segment_Discipline			Segment_Country			Segment_Career_Stage
		Grant Only	Hiring and Promotion Only	Cell Biology	Other Lab Biology	All Other Biology	US	UK or EU	Other Country	0-15 Years	16 or More Years
		A*	B	C	D	E	F	G	H	I	J
	#Total	110	89	50	396	35	182	207	96	109	373
Overall
When using the resources currently available to you, how satisfied are you with your ability to assess a candidate's research outputs?**	% 4-5	55%	46%	68%	54%	60%	68% G H	47%	51%	43%	60% I
Aspects of Assessment
Evaluate if research is credible	% 4-5	34%	29%	36%	37%	37%	37%	34%	42%	27%	40% I
Evaluate if research is trustworthy or reliable	% 4-5	29%	22%	40%	30%	34%	33%	29%	34%	21%	34% I
Evaluate if research was well designed	% 4-5	49%	38%	50%	48%	43%	51%	42%	57% G	43%	49%
Evaluate if research outputs are transparent and shared openly	% 4-5	35%	38%	46%	37%	43%	36%	37%	47%	29%	41% I
Evaluate if research was conducted ethically	% 4-5	31%	28%	30%	31%	31%	31%	25%	44% G	24%	32%
Evaluate if research is fully reported	% 4-5	33%	27%	34%	30%	34%	27%	29%	42% F	24%	33%
Evaluate if research is impactful	% 4-5	44%	36%	68% D	42%	43%	51% G	38%	47%	35%	47% I
Types of Outputs
Evaluate if peer-reviewed publications are credible	% 4-5	43%	36%	42%	45%	54%	48%	39%	54% G	38%	47%
Evaluate if preprints are credible	% 4-5	24%	21%	22%	23%	23%	21%	22%	27%	25%	22%
Evaluate if shared code is credible	% 4-5	19%	17%	22%	16%	11%	13%	15%	26% F G	20%	15%
Evaluate if shared lab protocols are credible	% 4-5	22%	24%	22%	23%	26%	19%	21%	35% F G	25%	23%
Evaluate if shared datasets are credible	% 4-5	21%	24%	26%	22%	17%	18%	22%	30% F	20%	22%
Assessment Goals
Evaluate if methods are sound	% 4-5	40%	33%	42%	41%	43%	43%	37%	45%	33%	43%
Evaluate if research is transparently reported	% 4-5	30%	25%	26%	30%	29%	23%	28%	43% F G	24%	31%
Evaluate if conclusions are well supported	% 4-5	53%	46%	64%	54%	51%	50%	52%	68% F G	46%	57% I
Evaluate if there are signs of fabrication, falsification, or plagiarism	% 4-5	25%	19%	28%	18%	23%	16%	16%	32% F G	18%	19%
Evaluate if statistical analyses are valid	% 4-5	35% B	22%	38%	30%	37%	32%	25%	43% G	26%	32%
Evaluate if research outputs advance the field	% 4-5	44% B	29%	54%	44%	37%	45%	41%	50%	35%	47% I
Evaluate if research outputs have societal impact	% 4-5	26%	19%	0.38	25%	23%	26%	22%	0.33	28%	25%
*Columns tested for significantly different percentage responses (letters shown in Row 4): A/B, C/D/E, F/G/H, I/J
Percentages within Segment groups were compared using a z-test with a significance level set at p < 0.05. All statistical analysis was conducted in R using the expss package.
A letter in any cell indicates that the percentage response of the segment in the cell is significantly higher than the segment represented by the letter (see row 4)
**Full question for this item differs: "When using the resources currently available to you, how satisfied are you with your ability to assess a candidate's research outputs?"

## Sheet: Table 6-Methods
	How do you normally evaluate if…?
Methods (select all)	Research is credible	Research is trustworthy or reliable	Research was well designed	Research was conducted ethically	Research outputs are transparent and shared openly	Research is fully reported	Research is impactful
Review research output	69% [65%, 73%]	67% [62%, 71%]	57% [53%, 62%]	46% [41%, 50%]	58% [54%, 63%]	62% [58%, 67%]	63% [59%, 67%]
Review figures	76% [72%, 80%]	72% [67%, 76%]	73% [69%, 77%]	29% [25%, 33%]	40% [36%, 45%]	58% [53%, 62%]	32% [28%, 36%]
Review methods	80% [76%, 83%]	77% [73%, 81%]	92% [89%, 94%]	68% [64%, 72%]	49% [44%, 53%]	63% [59%, 67%]	27% [23%, 31%]
Review open peer reviews	28% [24%, 32%]	29% [25%, 34%]	21% [17%, 25%]	18% [15%, 22%]	23% [19%, 27%]	23% [19%, 27%]	18% [15%, 22%]
Confirm output is peer reviewed	57% [53%, 62%]	56% [51%, 60%]	39% [35%, 43%]	34% [30%, 39%]	40% [36%, 45%]	40% [35%, 44%]	37% [33%, 41%]
Use author or lab reputation (1)	34% [30%, 38%]	36% [32%, 40%]	20% [17%, 24%]	25% [21%, 29%]	16% [13%, 20%]	19% [15%, 22%]	24% [20%, 28%]
Use journal reputation (1)	48% [43%, 52%]	43% [39%, 48%]	26% [22%, 30%]	28% [24%, 32%]	31% [27%, 35%]	24% [21%, 28%]	46% [41%, 50%]
Use journal impact factor (1)	19% [15%, 22%]	15% [12%, 19%]	9% [7%, 12%]	6% [4%, 9%]	8% [5%, 10%]	8% [6%, 11%]	31% [27%, 35%]
Check for shared data or code	29% [25%, 33%]	27% [24%, 32%]	21% [18%, 25%]	15% [12%, 19%]	48% [43%, 52%]	35% [31%, 40%]	11% [8%, 14%]
Check for citation by others	46% [42%, 51%]	41% [37%, 46%]	24% [20%, 28%]	15% [12%, 19%]	29% [25%, 33%]	26% [22%, 30%]	64% [59%, 68%]
Consult related publications	46% [42%, 51%]	46% [41%, 50%]	39% [35%, 44%]	26% [22%, 30%]	27% [23%, 31%]	32% [28%, 36%]	44% [40%, 49%]
Consult with colleagues	35% [30%, 39%]	31% [27%, 35%]	27% [23%, 31%]	22% [18%, 26%]	19% [15%, 23%]	17% [14%, 21%]	32% [28%, 36%]
Other, please specify	3% [2%, 5%]	3% [2%, 5%]	2% [1%, 4%]	9% [6%, 12%]	4% [2%, 6%]	4% [2%, 6%]	6% [4%, 8%]
Not applicable	0% [0%, 2%]	1% [1%, 3%]	1% [0%, 2%]	6% [4%, 9%]	7% [5%, 10%]	8% [6%, 11%]	4% [2%, 6%]
	1	1	1	1	1	1	1
SUMMARY TABLE	Research is credible	Research is trustworthy or reliable	Research was well designed	Research was conducted ethically	Research outputs are transparent and shared openly	Research is fully reported	Research is impactful
At least one extrinsic proxy (2)	57% [52%, 61%]	56% [51%, 60%]	35% [31%, 40%]	39% [35%, 44%]	36% [32%, 41%]	32% [28%, 36%]	56% [51%, 60%]
Only extrinsic proxies (3)	1% [0%, 2%]	1% [1%, 3%]	1% [0%, 2%]	2% [1%, 4%]	2% [1%, 4%]	1% [0%, 2%]	1% [1%, 3%]
At least one other method (4)	99% [97%, 100%]	98% [96%, 99%]	99% [97%, 99%]	92% [89%, 94%]	91% [88%, 93%]	92% [89%, 94%]	95% [93%, 97%]
Not applicable	0% [0%, 2%]	1% [1%, 3%]	1% [0%, 2%]	6% [4%, 9%]	7% [5%, 10%]	8% [6%, 11%]	4% [2%, 6%]
(1) Extrinsic proxy (use author or lab reputation, use journal reputation, and use journal impact factor)
(2) Percentage that selected at least one of the three extrinsic proxies
(3) Percentage that only selected one of the three extrinsic proxies
(4) Percentage that selected at least one of the methods listed other than the three extrinsic proxies

## Sheet: Table 7-Methods by Segment
How do you normally evaluate if research is credible? Please select all that apply.
	Segment_Committee		Segment_Discipline			Segment_Country			Segment_Career_Stage
	Grant Only	Hiring and Promotion Only	Cell Biology	Other Lab Biology	All Other Biology	US	UK or EU	Other Country	0-15 Years	16 or More Years
Category	A*	B	C	D	E	F	G	H	I	J
Total n	110	89	50	396	35	182	207	96	109	373
Review research output	61%	75% A	68%	69%	74%	59%	75% F	73%	65%	70%
Review figures	75%	67%	88% E	77%	60%	82% H	74%	68%	72%	77%
Review methods	85% B	73%	84%	80%	83%	80%	83%	74%	79%	80%
Review open peer reviews	31% B	17%	34%	27%	31%	24%	26%	38%	29%	27%
Confirm output is peer reviewed	63%	53%	60%	57%	54%	61%	50%	66% G	51%	59%
Use author or lab reputation	32%	35%	42%	34%	26%	34%	32%	36%	29%	35%
Use journal reputation	45%	48%	40%	48%	49%	49%	42%	57% G	45%	49%
Use journal impact factor	15%	18%	24%	18%	14%	21%	14%	23%	21%	18%
Check for shared data or code	31%	26%	32%	29%	26%	24%	31%	31%	33%	27%
Check for citation by others	50% B	34%	54%	46%	43%	53% G	35%	57% G	44%	47%
Consult related publications	46%	35%	38%	48%	40%	40%	50%	51%	39%	49%
Consult with colleagues	31%	30%	18%	37% C	31%	39%	33%	30%	42%	32%
Other, please specify	2%	1%	2%	3%	6%
Not applicable	1%			1%		1%	0%		1%	0%
How do you normally evaluate if research is trustworthy or reliable? Please select all that apply.
	Segment_Committee		Segment_Discipline			Segment_Country			Segment_Career_Stage
	Grant Only	Hiring and Promotion Only	Cell Biology	Other Lab Biology	All Other Biology	US	UK or EU	Other Country	0-15 Years	16 or More Years
Category	A*	B	C	D	E	F	G	H	I	J
Total n	110	89	50	396	35	182	207	96	109	373
Review research output	59%	71%	60%	68%	60%	57%	74% F	69%	57%	70% I
Review figures	67%	63%	86% E	71%	57%	74%	73%	65%	72%	72%
Review methods	75%	73%	76%	77%	89%	75%	81%	74%	76%	77%
Review open peer reviews	30%	19%	26%	29%	34%	27%	27%	39%	29%	29%
Confirm output is peer reviewed	53%	54%	60%	55%	49%	59%	51%	58%	49%	58%
Use author or lab reputation	36%	38%	38%	36%	29%	36%	33%	42%	34%	36%
Use journal reputation	42%	42%	36%	44%	40%	47%	38%	48%	43%	43%
Use journal impact factor	16%	18%	12%	15%	17%	16%	12%	21%	20%	14%
Check for shared data or code	22%	27%	26%	27%	31%	21%	29%	35% F	30%	27%
Check for citation by others	42% B	28%	42%	41%	43%	43%	34%	54% G	40%	42%
Consult related publications	48%	43%	36%	48%	34%	43%	44%	53%	45%	46%
Consult with colleagues	25%	30%	12%	33% C	31%	32%	31%	27%	31%	31%
Other, please specify	3%	1%	2%	3%	3%
Not applicable	1%	3%	2%	1%		1%	2%	1%		2%
How do you normally evaluate if research was well designed? Please select all that apply.
	Segment_Committee		Segment_Discipline			Segment_Country			Segment_Career_Stage
	Grant Only	Hiring and Promotion Only	Cell Biology	Other Lab Biology	All Other Biology	US	UK or EU	Other Country	0-15 Years	16 or More Years
Category	A*	B	C	D	E	F	G	H	I	J
Total n	110	89	50	396	35	182	207	96	109	373
Review research output	54%	58%	56%	58%	60%	49%	64% F	59%	56%	58%
Review figures	69%	71%	82%	74%	60%	82% G H	71%	61%	76%	73%
Review methods	89%	92%	92%	92%	0.1	93%	90%	96%	92%	92%
Review open peer reviews	22%	15%	22%	20%	20%	20%	20%	22%	24%	19%
Confirm output is peer reviewed	38%	43%	52%	38%	34%	38%	37%	44%	29%	42% I
Use author or lab reputation	17%	18%	20%	20%	14%	19%	23%	16%	21%	20%
Use journal reputation	27%	33%	24%	26%	29%	28%	25%	24%	25%	26%
Use journal impact factor	11%	10%	6%	9%	11%	10%	6%	12%	11%	8%
Check for shared data or code	23%	20%	26%	20%	26%	18%	23%	24%	20%	21%
Check for citation by others	22%	18%	32%	23%	17%	28%	18%	28%	21%	25%
Consult related publications	46% B	25%	36%	40%	34%	35%	43%	39%	38%	40%
Consult with colleagues	24%	25%	12%	28% C	34% C	29%	28%	20%	28%	26%
Other, please specify	3%	3%		2%	6%
Not applicable	1%		2%	1%			2%			1%
How do you normally evaluate if research outputs are transparent and shared openly? Please select all that apply.
	Segment_Committee		Segment_Discipline			Segment_Country			Segment_Career_Stage
	Grant Only	Hiring and Promotion Only	Cell Biology	Other Lab Biology	All Other Biology	US	UK or EU	Other Country	0-15 Years	16 or More Years
Category	A*	B	C	D	E	F	G	H	I	J
Total n	110	89	50	396	35	182	207	96	109	373
Review research output	61%	52%	60%	59%	49%	51%	62%	64%	55%	59%
Review figures	44%	31%	48%	40%	37%	37%	40%	45%	38%	41%
Review methods	56% B	42%	58%	48%	46%	46%	51%	49%	47%	49%
Review open peer reviews	25% B	10%	22%	23%	20%	19%	21%	33% F	22%	23%
Confirm output is peer reviewed	41%	39%	42%	41%	29%	40%	39%	44%	30%	43% I
Use author or lab reputation	15%	16%	14%	18%	6%	16%	16%	16%	13%	17%
Use journal reputation	29%	31%	22%	31%	37%	30%	29%	36%	24%	32%
Use journal impact factor	8%	7%	6%	8%	11%	8%	7%	8%	6%	8%
Check for shared data or code	48%	44%	50%	48%	46%	42%	51%	53%	48%	48%
Check for citation by others	34% B	13%	38%	29%	17%	31%	25%	33%	17%	32% I
Consult related publications	31%	21%	16%	29%	20%	23%	28%	31%	14%	30% I
Consult with colleagues	15%	10%	8%	21%	6%	21%	20%	10%	14%	20%
Other, please specify	5%	2%	10% D	3%	3%
Not applicable	4%	13% A	2%	8%	9%	9%	4%	9%	11%	6%
How do you normally evaluate if research was conducted ethically? Please select all that apply.
	Segment_Committee		Segment_Discipline			Segment_Country			Segment_Career_Stage
	Grant Only	Hiring and Promotion Only	Cell Biology	Other Lab Biology	All Other Biology	US	UK or EU	Other Country	0-15 Years	16 or More Years
Category	A*	B	C	D	E	F	G	H	I	J
Total n	110	89	50	396	35	182	207	96	109	373
Review research output	47%	35%	40%	46%	51%	40%	48%	51%	41%	47%
Review figures	35% B	21%	38%	28%	26%	32%	26%	29%	26%	30%
Review methods	67%	63%	74%	66%	83%	67%	69%	68%	61%	70%
Review open peer reviews	16%	12%	12%	18%	23%	15%	16%	26%	14%	19%
Confirm output is peer reviewed	32%	33%	42%	34%	29%	37%	31%	35%	33%	35%
Use author or lab reputation	31%	22%	20%	25%	23%	25%	23%	26%	25%	24%
Use journal reputation	33%	22%	20%	29%	31%	30%	28%	24%	23%	29%
Use journal impact factor	11%	4%	6%	6%	14%	9% G	3%	9% G	6%	6%
Check for shared data or code	21%	16%	12%	15%	20%	13%	14%	21%	18%	14%
Check for citation by others	21% B	8%	22%	15%	11%	16%	14%	17%	12%	16%
Consult related publications	29%	20%	22%	27%	26%	24%	27%	28%	24%	26%
Consult with colleagues	24%	19%	12%	24%	11%	21%	21%	25%	22%	22%
Other, please specify	8%	6%	12%	8%	6%
Not applicable	6%	11%	2%	7%		5%	8%	4%	6%	6%
How do you normally evaluate if research is fully reported? Please select all that apply.
	Segment_Committee		Segment_Discipline			Segment_Country			Segment_Career_Stage
	Grant Only	Hiring and Promotion Only	Cell Biology	Other Lab Biology	All Other Biology	US	UK or EU	Other Country	0-15 Years	16 or More Years
Category	A*	B	C	D	E	F	G	H	I	J
Total n	110	89	50	396	35	182	207	96	109	373
Review research output	63%	54%	64%	63%	60%	51%	68% F	71% F	56%	64%
Review figures	61%	49%	68%	58%	49%	54%	61%	57%	54%	59%
Review methods	65% B	51%	66%	63%	60%	55%	70% F	65%	58%	65%
Review open peer reviews	28% B	13%	30%	22%	20%	19%	25%	26%	26%	22%
Confirm output is peer reviewed	35%	30%	40%	40%	34%	39%	40%	41%	34%	41%
Use author or lab reputation	18%	19%	24%	18%	11%	19%	17%	21%	17%	19%
Use journal reputation	24%	26%	28%	24%	20%	27%	21%	25%	23%	24%
Use journal impact factor	6%	10%	6%	8%	6%	10%	6%	7%	5%	9%
Check for shared data or code	31%	27%	24%	37%	37%	29%	38%	43%	31%	36%
Check for citation by others	25%	24%	32%	26%	17%	24%	23%	35%	20%	27%
Consult related publications	35%	22%	30%	33%	29%	29%	35%	31%	29%	32%
Consult with colleagues	14%	20%	8%	18%	17%	20%	17%	11%	12%	18%
Other, please specify	4%	4%	4%	3%	9%
Not applicable	6%	12%	4%	8%	9%	9%	5%	11%	12%	7%
How do you normally evaluate if research is impactful? Please select all that apply.
	Segment_Committee		Segment_Discipline			Segment_Country			Segment_Career_Stage
	Grant Only	Hiring and Promotion Only	Cell Biology	Other Lab Biology	All Other Biology	US	UK or EU	Other Country	0-15 Years	16 or More Years
Category	A*	B	C	D	E	F	G	H	I	J
Total n	110	89	50	396	35	182	207	96	109	373
Review research output	55%	63%	58%	65%	49%	60%	67%	59%	53%	66% I
Review figures	32%	34%	40%	32%	20%	38% H	30%	23%	27%	33%
Review methods	29%	28%	28%	28%	23%	28%	27%	25%	20%	29%
Review open peer reviews	24% B	9%	22%	17%	23%	17%	16%	24%	17%	18%
Confirm output is peer reviewed	35%	43%	46%	36%	34%	41%	31%	43%	28%	39% I
Use author or lab reputation	19%	26%	18%	23%	31%	23%	26%	20%	22%	24%
Use journal reputation	47%	45%	36%	45%	57%	49%	41%	50%	45%	46%
Use journal impact factor	30%	33%	34%	29%	49% D	31%	29%	35%	35%	29%
Check for shared data or code	11%	7%	10%	11%	11%	10%	10%	15%	10%	11%
Check for citation by others	62%	62%	66%	63%	71%	63%	61%	72%	62%	65%
Consult related publications	48% B	26%	46%	45%	34%	40%	49%	43%	39%	46%
Consult with colleagues	29%	25%	24%	33%	31%	37% H	32%	22%	34%	31%
Other, please specify	5%	4%	6%	6%	3%
Not applicable	4%	3%	4%	4%	3%	3%	5%	1%	5%	3%
*Columns tested for significantly different percentage responses (letters shown in Row 4): A/B, C/D/E, F/G/H, I/J
Percentages within Segment groups were compared using a z-test with a significance level set at p<0.05. All statistical analysis was conducted in R using the expss package.
A letter in any cell indicates that the percentage response of the segment in the cell is significantly higher than the segment represented by the letter (see row 4)
